# Supplementary material for: Hydrogenation of CO to olefins over a supported iron catalyst on MgAl2O4 spinel: effects of the spinel synthesis method
Source: Royal Society of Chemistry journal article supplement (doi:10.1039/d0ra08387a), 2020-01-01
Supplement: d0ra08387a1.pdf [file d0ra08387a1.pdf]

## Supporting Information

for

Hydrogenation of CO to Olefins over Supported Iron Catalyst on

MgAl<sub>2</sub>O<sub>4</sub> Spinel : Effect of the spinel Synthesis Method

Yu Wang<sup>1</sup>, Hou-Xing Li<sup>1</sup>, Xue-Gang Li<sup>1</sup>, Wen-De Xiao<sup>1\*</sup> De Chen<sup>2</sup>

<sup>1</sup>Shanghai Jiao Tong University, Shanghai, China

<sup>2</sup>Norwegian University of Science and Technology, 7491 Trondheim, Norway

E-mail: [wdxiao@sjtu.edu.cn](mailto:wdxiao@sjtu.edu.cn)

Table S1. The amount of reagents used for support preparation (unit: g)

| <i>Sample</i> | $Al(NO_3)_3 \cdot 9H_2O$ | $Mg(NO_3)_2 \cdot 6H_2O$ | $C_6H_6O_7 \cdot H_2O$<br>(CA) | $C_{10}H_{16}N_2O_8$<br>(EDTA) | $NH_3 \cdot H_2O$<br>(25%) |
|---------------|--------------------------|--------------------------|--------------------------------|--------------------------------|----------------------------|
| <i>MAC</i>    | 30.0104                  | 10.2564                  | 25.2168                        | --                             | --                         |
| <i>MAG</i>    | 30.0104                  | 10.2564                  | --                             | 35.0688                        | 30 mL                      |
| <i>MAP</i>    | 30.0104                  | 10.2564                  | --                             | --                             | 300 mL                     |

Table S2. The amount of reagents used for catalyst preparation (unit:g)

| <i>Sample</i> | <i>Support</i> | $Fe(NO_3)_3 \cdot 9H_2O$ | $Mn(NO_3)_2$<br>(50% aq) | $KNO_3$ | $C_6H_6O_7 \cdot H_2O$<br>(CA) |
|---------------|----------------|--------------------------|--------------------------|---------|--------------------------------|
| <i>CMAC</i>   | 5.0000         | 4.1461                   | 0.7480                   | 0.1488  | 3.1928                         |
| <i>CMAG</i>   | 5.0000         | 4.1461                   | 0.7480                   | 0.1488  | 3.1928                         |
| <i>CMAP</i>   | 5.0000         | 4.1461                   | 0.7480                   | 0.1488  | 3.1928                         |

Table S3 Compositions of the catalysts determined by ICP

| K-Mn-Fe/ MgO·Al <sub>2</sub> O <sub>3</sub> -X | CMAC | CMAG | CMAP |
|------------------------------------------------|------|------|------|
| K (wt%)                                        | 0.73 | 0.68 | 0.71 |
| Mn (wt%)                                       | 1.82 | 1.75 | 1.78 |
| Fe (wt%)                                       | 7.06 | 6.89 | 6.97 |

Table S4 Data of peak deconvolution for CO<sub>2</sub>-TPD of supports

| MAC               |                  |                | MAG               |                  |                | MAP               |                  |                |
|-------------------|------------------|----------------|-------------------|------------------|----------------|-------------------|------------------|----------------|
| Center Temp. (°C) | Peak Area (a.u.) | Percentage (%) | Center Temp. (°C) | Peak Area (a.u.) | Percentage (%) | Center Temp. (°C) | Peak Area (a.u.) | Percentage (%) |
| 142.2             | 453.1            | 7.4            | 115.0             | 54.6             | 3.8            | 141.0             | 442.0            | 19.8           |
| 193.7             | 1473.3           | 24.2           | 142.2             | 481.9            | 33.9           | 188.0             | 818.4            | 36.6           |
| 278.4             | 1922.4           | 31.6           | 214.2             | 309.4            | 21.7           | 246.9             | 589.6            | 26.4           |
| 370.3             | 535.1            | 8.8            | 285.4             | 346.8            | 24.4           | 341.1             | 199.4            | 8.9            |
| 478.9             | 940.0            | 15.4           | 420.9             | 153.8            | 10.8           | 529.7             | 184.2            | 8.3            |
| 557.1             | 763.6            | 12.5           | 585.3             | 76.6             | 5.4            |                   |                  |                |

Table S5 Data of peak deconvolution for CO<sub>2</sub>-TPD of catalysts

| CMAC              |                  |                | CMAG              |                  |                | CMAP              |                  |                |
|-------------------|------------------|----------------|-------------------|------------------|----------------|-------------------|------------------|----------------|
| Center Temp. (°C) | Peak Area (a.u.) | Percentage (%) | Center Temp. (°C) | Peak Area (a.u.) | Percentage (%) | Center Temp. (°C) | Peak Area (a.u.) | Percentage (%) |
| 136.2             | 879.1            | 19.4           | 133.3             | 319.1            | 23.1           | 160.3             | 630.5            | 21.6           |
| 185.7             | 983.7            | 21.7           | 195.5             | 411.8            | 29.8           | 218.1             | 826.4            | 28.3           |
| 253.0             | 577.5            | 12.7           | 279.1             | 158.9            | 11.5           | 323.6             | 874.6            | 29.9           |
| 318.2             | 428.6            | 9.4            | 350.8             | 51.1             | 3.7            | 507.8             | 280.3            | 9.6            |
| 426.3             | 615.9            | 13.6           | 506.3             | 194.8            | 14.1           | 699.5             | 310.0            | 10.6           |
| 496.3             | 577.8            | 12.7           | 438.4             | 28.2             | 2.0            |                   |                  |                |
| 655.3             | 219.5            | 4.8            | 604.1             | 167.5            | 12.1           |                   |                  |                |
| 589.8             | 260.0            | 5.7            | 737.4             | 49.5             | 3.6            |                   |                  |                |

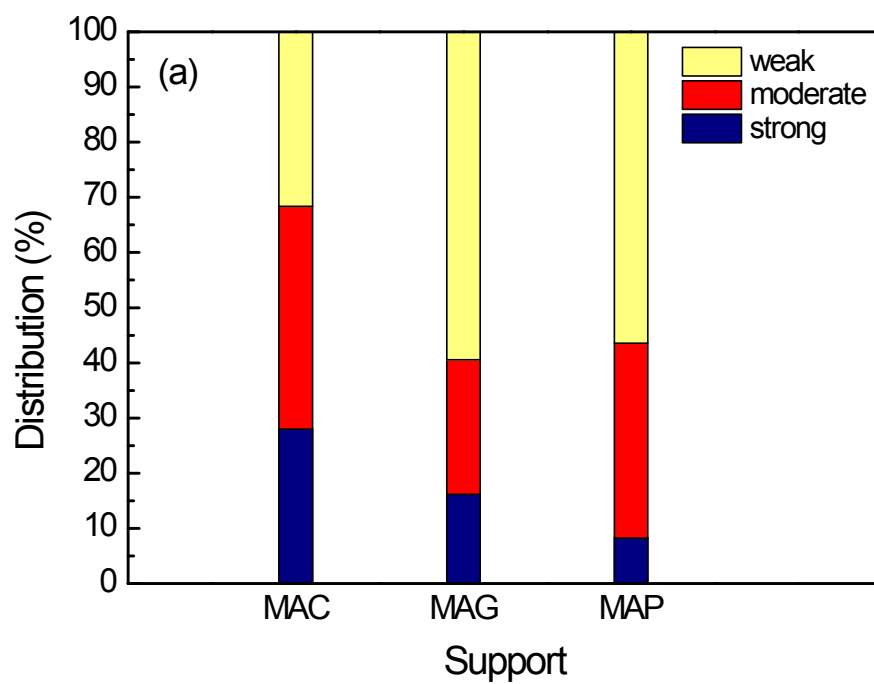

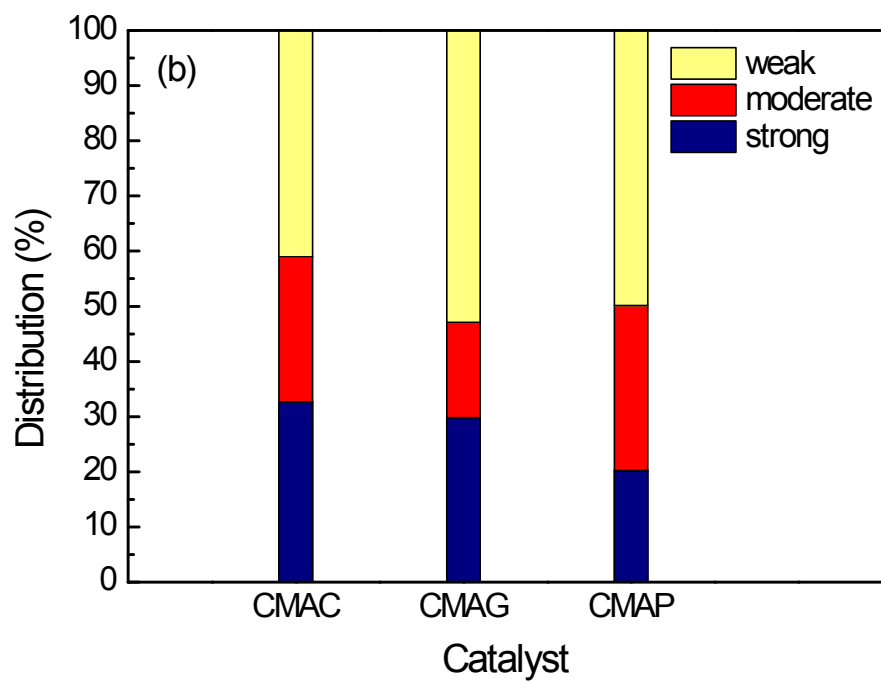

Fig. S1. CO<sub>2</sub>-TPD of the supports: (a) and corresponding catalysts: (b).

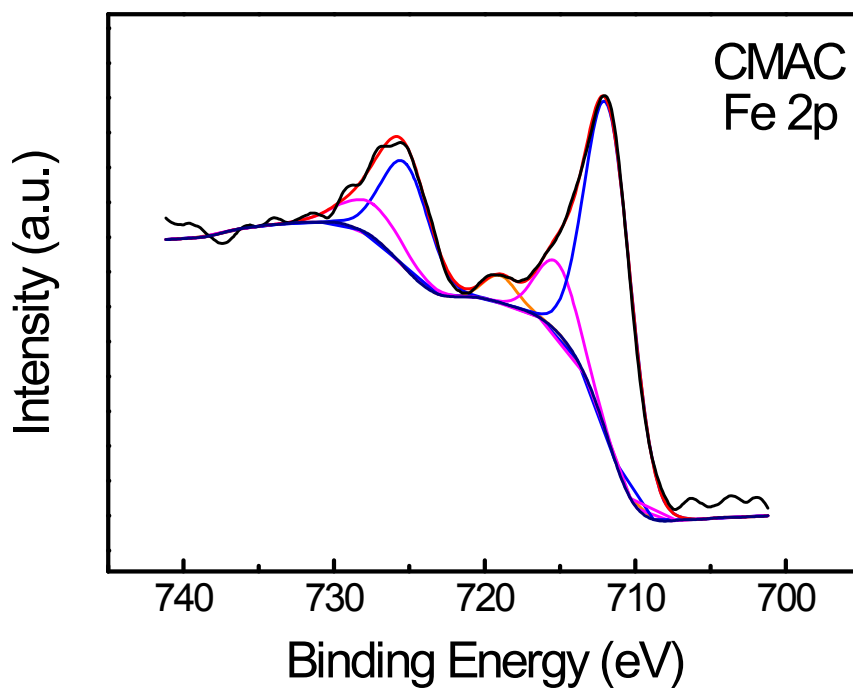

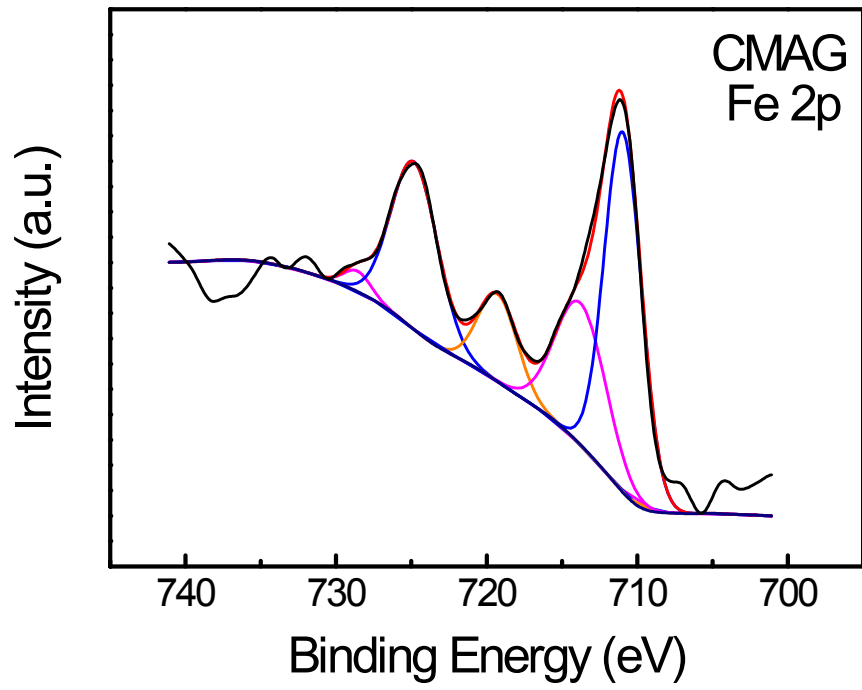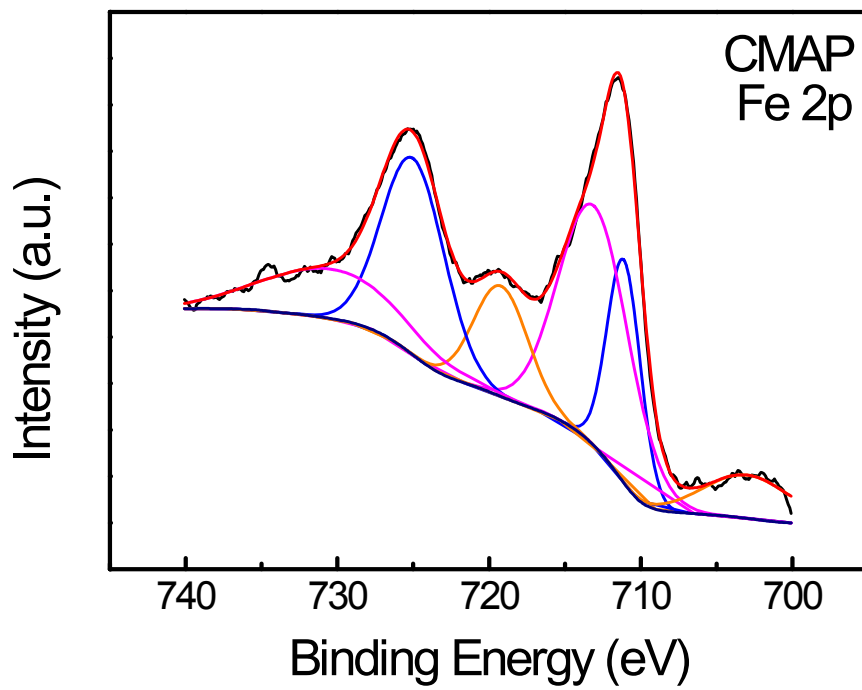

Fig. S2. Fe 2p XPS spectra of pretreated catalysts

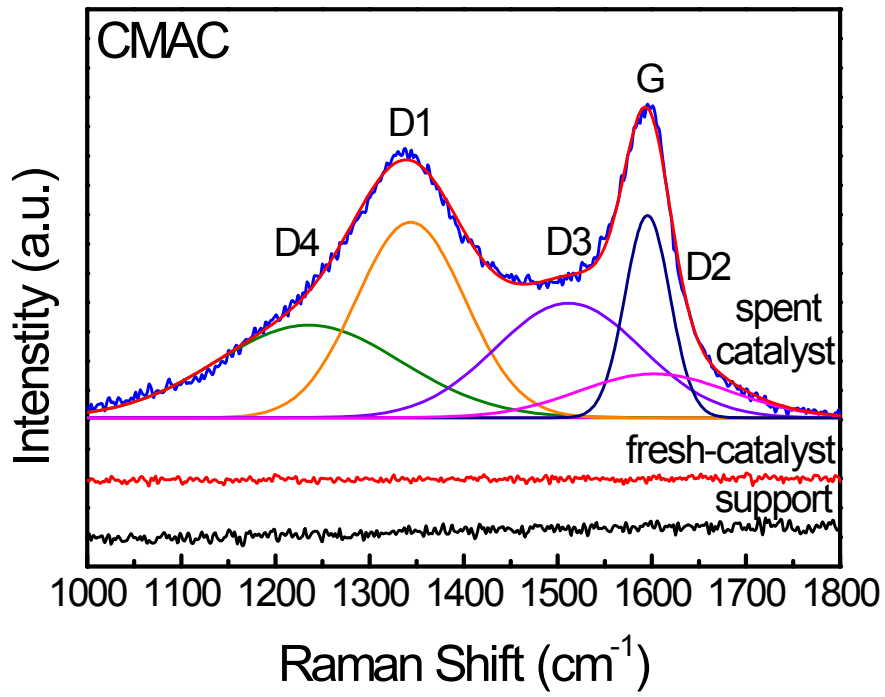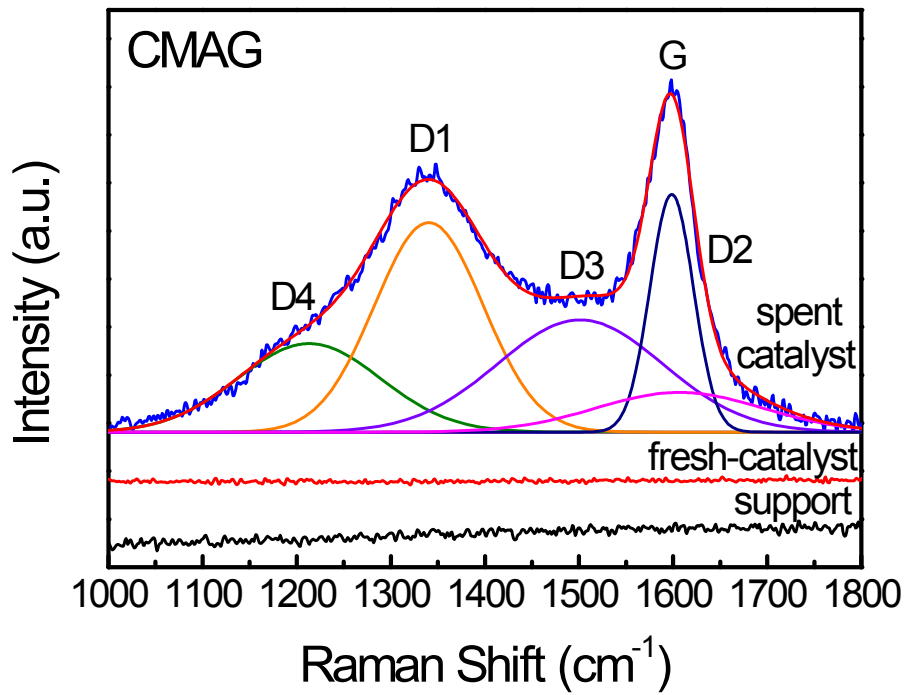

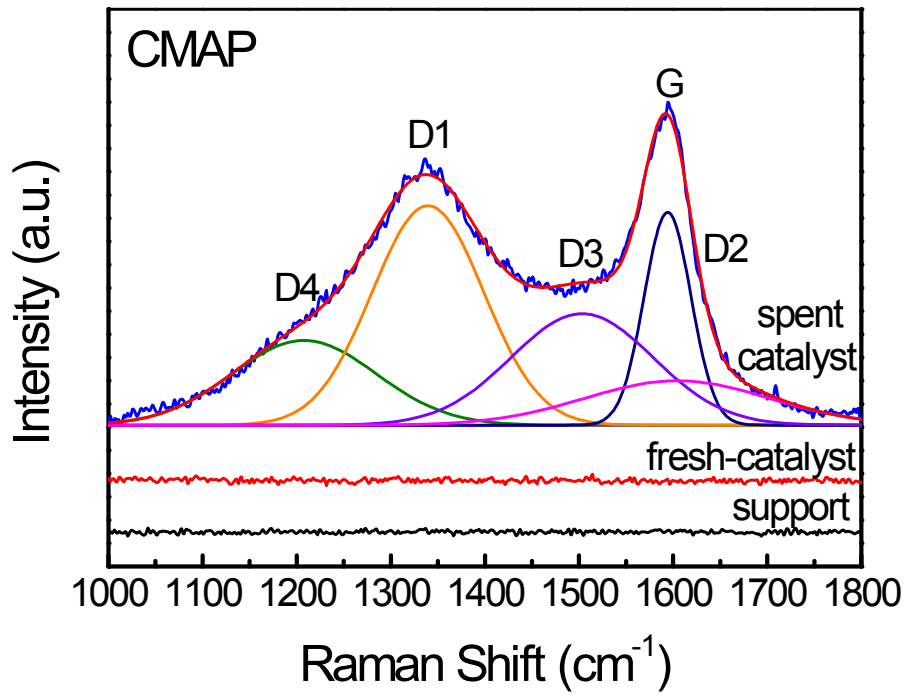

Fig. S3. Raman spectra of spent catalysts

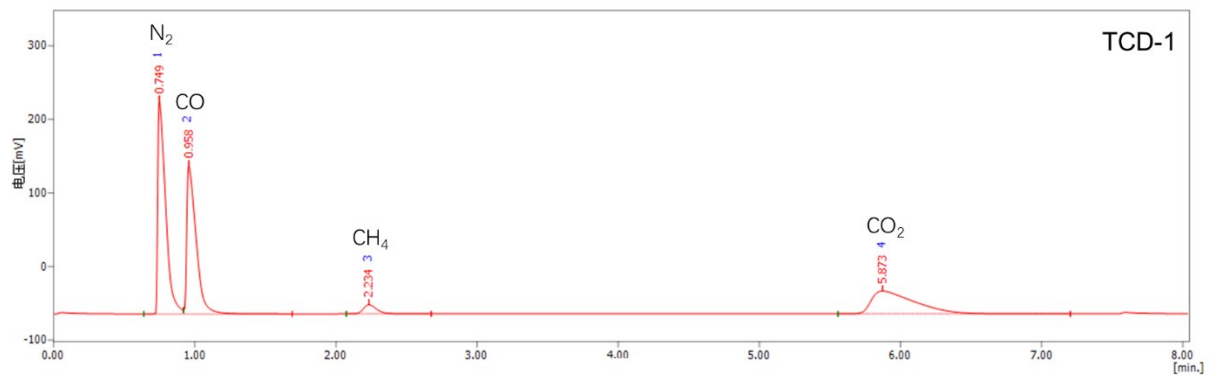

Fig. S4 Chromatogram of TCD detector

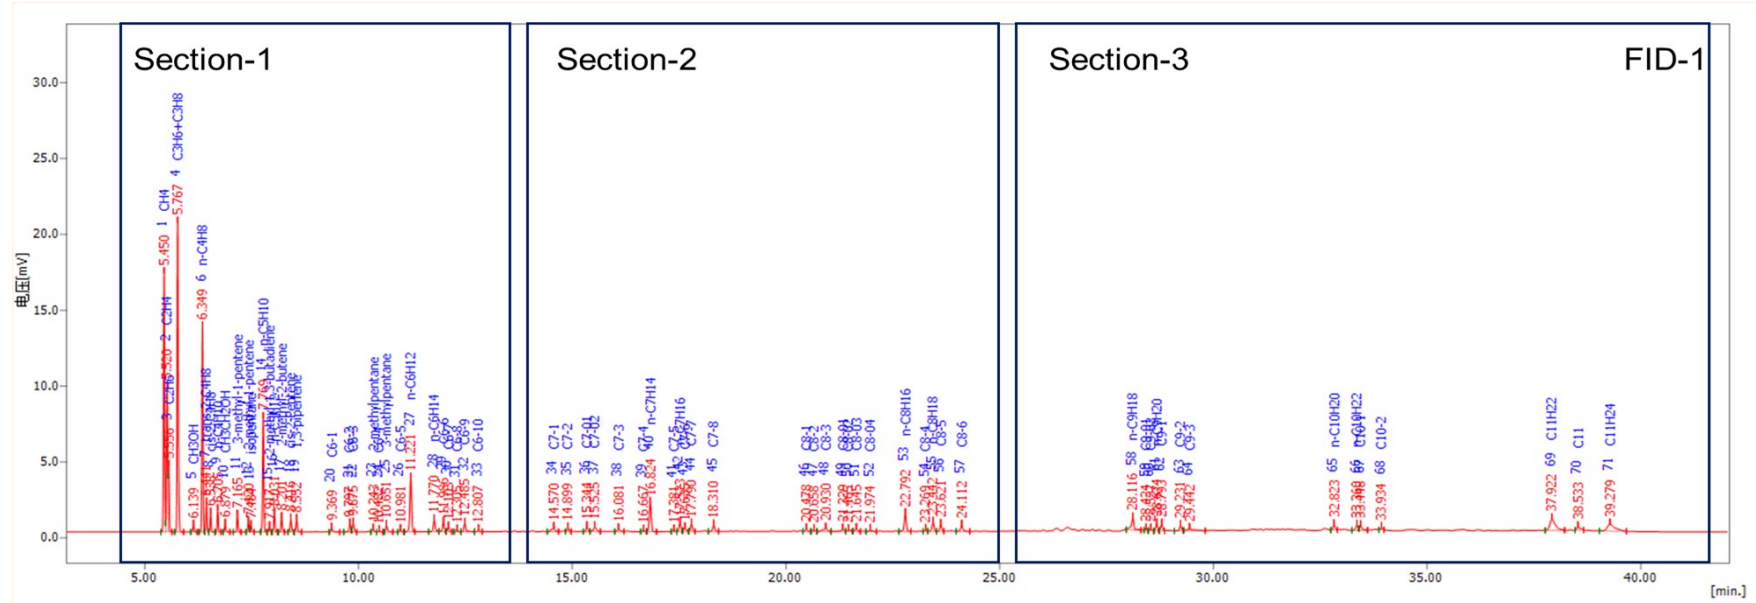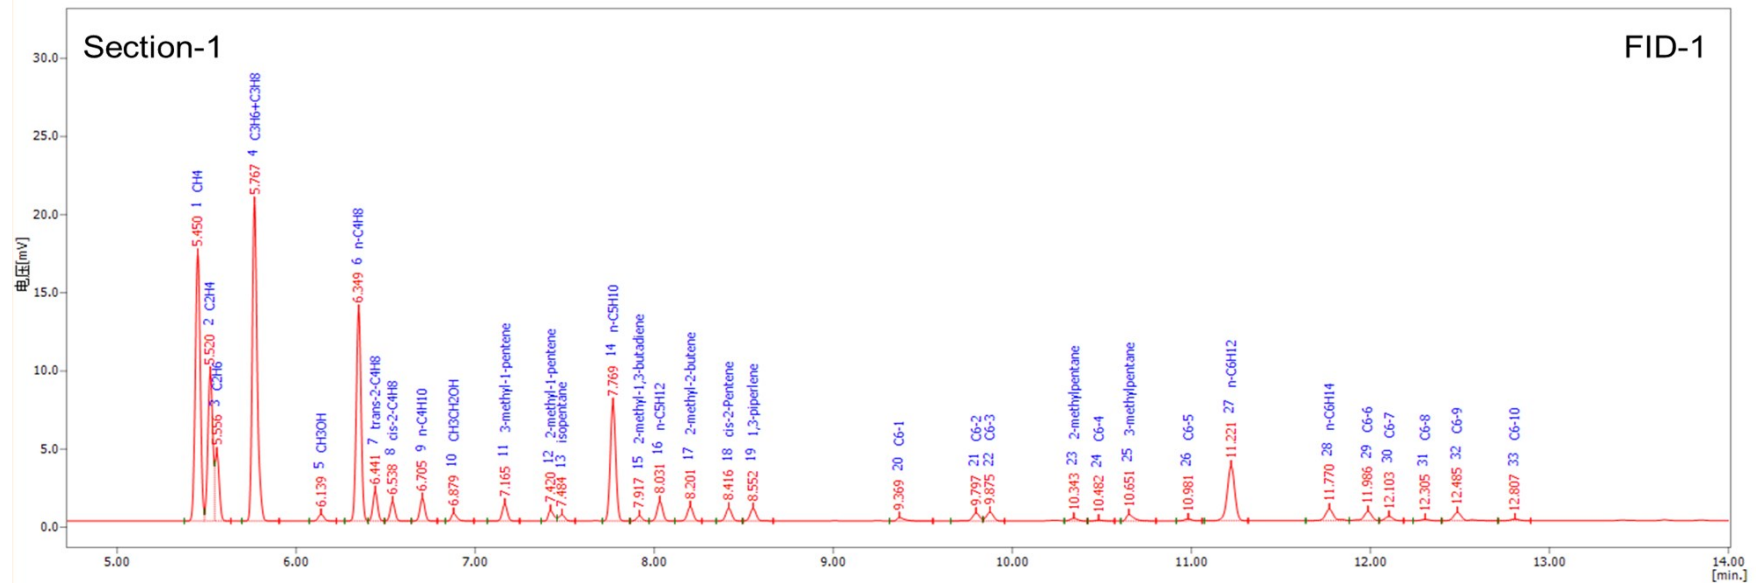



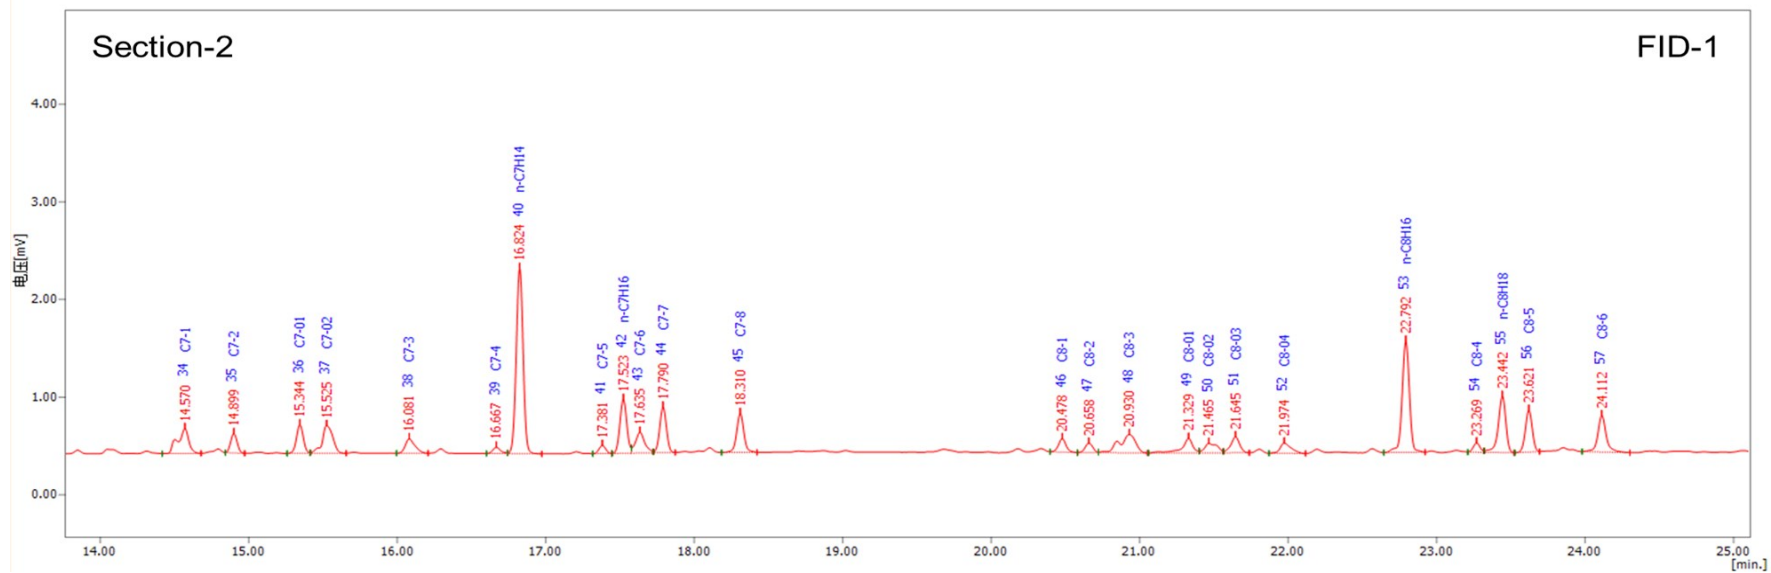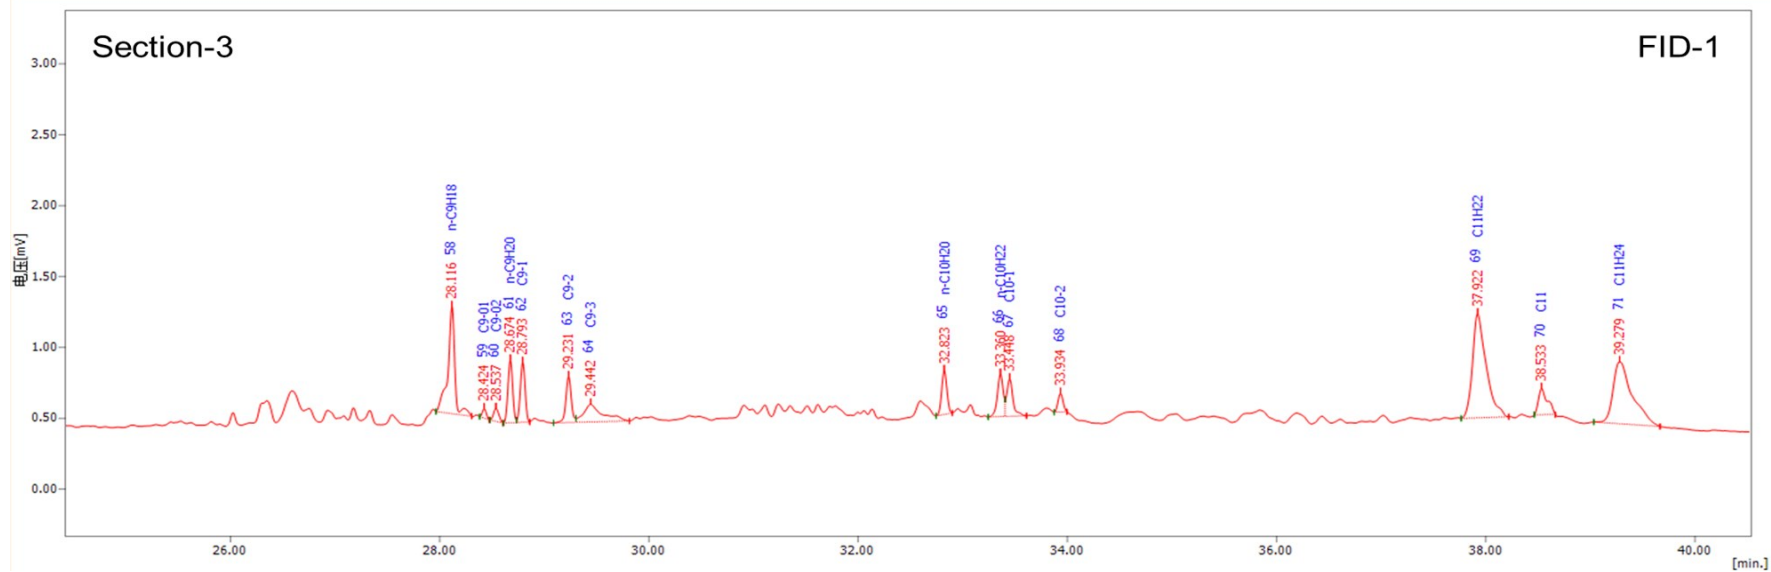

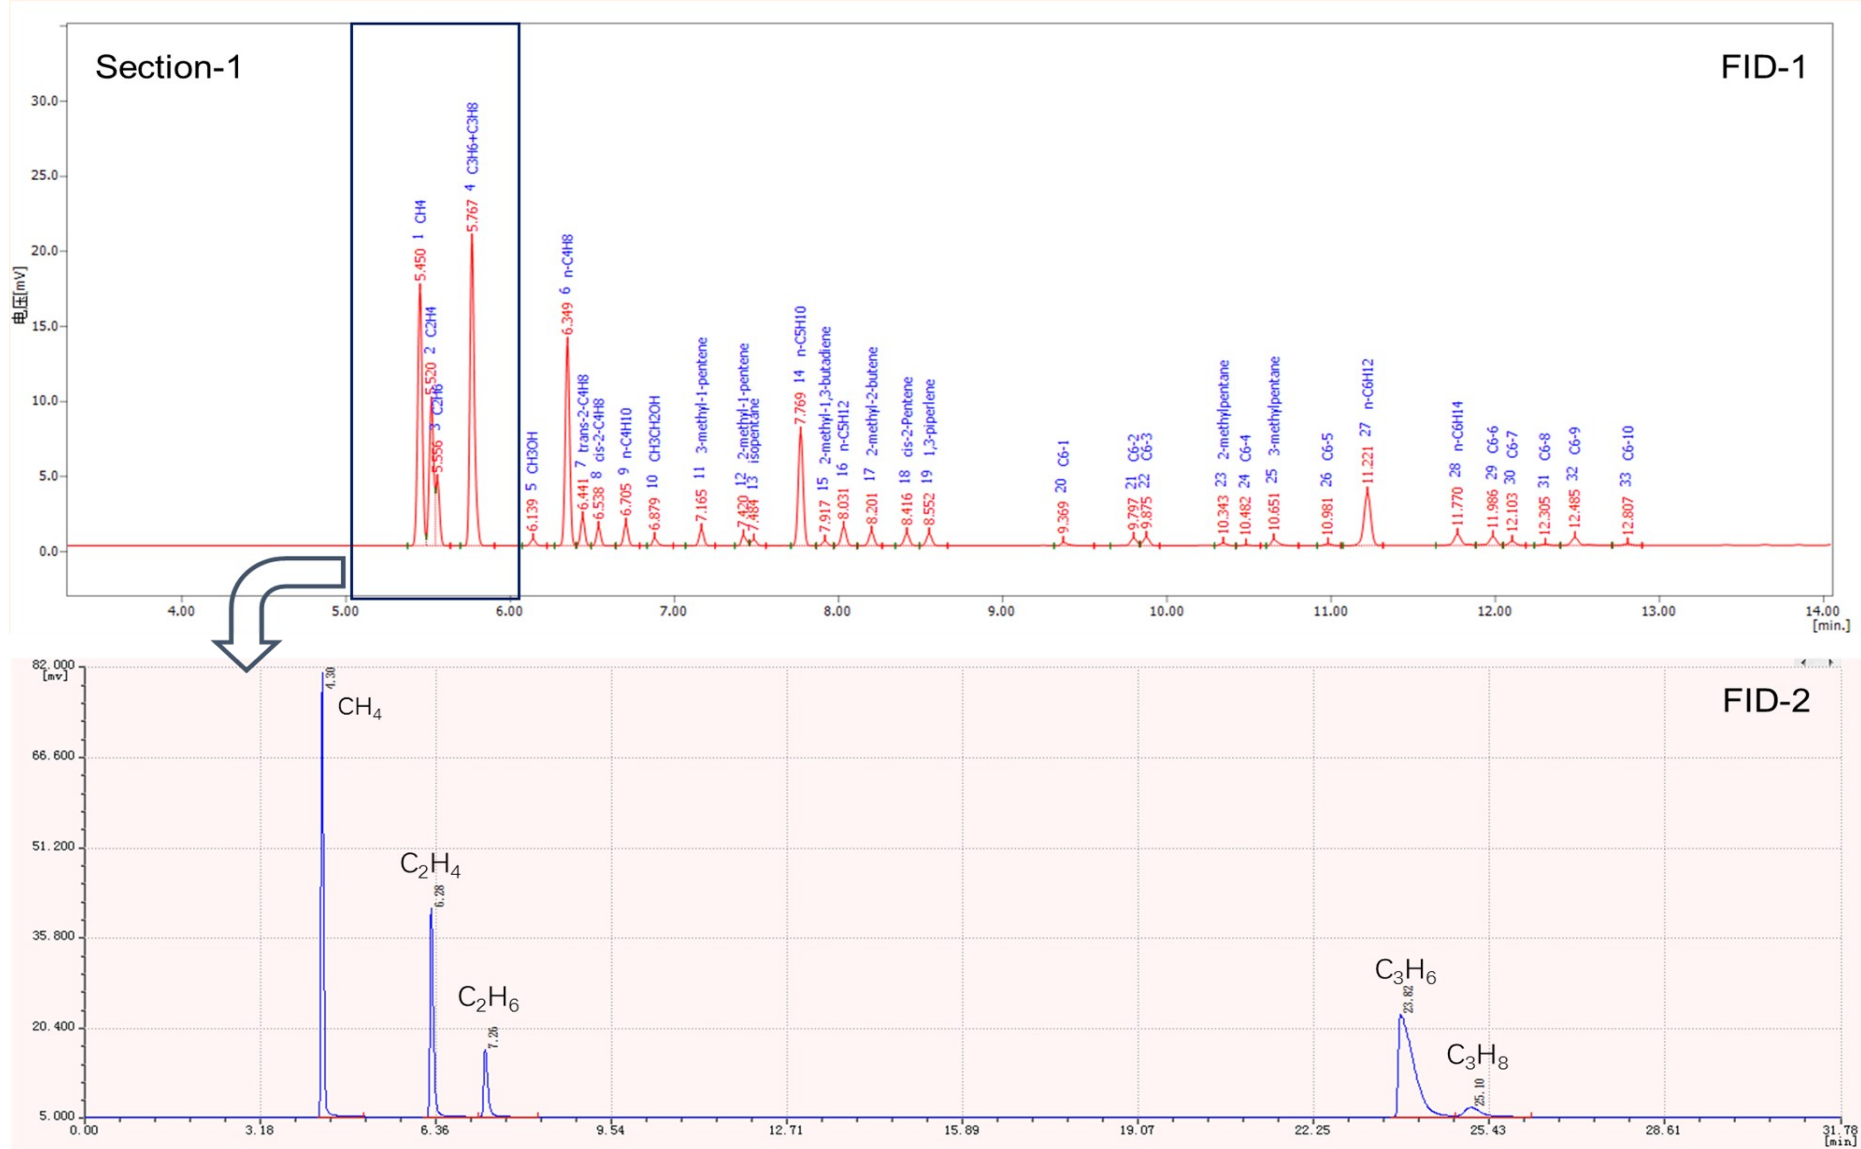

Fig. S5 Chromatogram of FID detector
